# Supplementary material for: EFICAz2: enzyme function inference by a combined approach enhanced by machine learning
Source: PubMed Central journal article supplement (PMC2670841; doi:10.1186/1471-2105-10-107), 2009-04-13
Supplement: 1471-2105-10-107-S1.pdf [file 1471-2105-10-107-S1.pdf]

|                                              | EC numbers | Swiss-Prot IDs      | Aligned positions corresponding to Functionally Discriminating Residues (FDRs) |                                       |                               |                                        |                               |  |
|----------------------------------------------|------------|---------------------|--------------------------------------------------------------------------------|---------------------------------------|-------------------------------|----------------------------------------|-------------------------------|--|
|                                              |            |                     | 113                                                                            | 124                                   | 218                           | 238 240                                | 302                           |  |
| Homofunctional Multiple Sequence Alignment   | 1.1.1.28   | LDHD_ECOLI          | PEAVA <b>E</b> HAIGM                                                           | MMTLN <b>R</b> RIHRA                  | PLTPEN <b>I</b> YHLLN         | GVMIVN <b>T</b> SRGA                   | VLFTG <b>H</b> QAFLT          |  |
|                                              | 1.1.1.28   | LDHD_LACDE          | PNAIA <b>E</b> HAAIQ                                                           | AARI <b>L</b> RQAKAM                  | PDVPA <b>N</b> VHMIN          | DVVIVN <b>V</b> SRGP                   | VLVTP <b>H</b> TAFYF          |  |
|                                              | 1.1.1.28   | LDHD_LACHE          | PNAIA <b>E</b> HAAIQ                                                           | AARV <b>L</b> RQDKRM                  | PDVPA <b>N</b> VHMIN          | GVVIVN <b>C</b> SRGR                   | VLVTP <b>H</b> TAFYF          |  |
|                                              | 1.1.1.28   | LDHD_LACPE          | PNAIA <b>E</b> LSVTQ                                                           | LMQL <b>L</b> RQTPMF                  | PALKD <b>N</b> YHMLN          | GAYI <b>L</b> NFARGT                   | VLITP <b>H</b> TAFYF          |  |
|                                              | 1.1.1.28   | LDHD_LEUMC          | PNAIA <b>E</b> HSM <b>L</b> Q                                                  | LSR <b>L</b> L <b>R</b> RTKAL         | PGVPE <b>N</b> HHLIN          | GVVIM <b>N</b> AARGN                   | VMITP <b>H</b> TAFYF          |  |
|                                              | 1.1.1.28   | LDHD_PEDAC          | PRAIA <b>E</b> LSVTQ                                                           | LLALL <b>R</b> KIPEF                  | PALKD <b>N</b> YHMLD          | GTFI <b>L</b> NFARGT                   | VMITP <b>H</b> AAFYF          |  |
| Heterofunctional Multiple Sequence Alignment | 1.1.1.95   | SERA_METTH          | SITVA <b>E</b> HSIGL                                                           | MLAL <b>A</b> RKIAIA                  | PLTPET <b>R</b> RHLIS         | TAFIV <b>N</b> CARGG                   | VVLTP <b>H</b> IGAST          |  |
|                                              | 3.3.1.1    | SAHH_SYNY3          | -RAM <b>F</b> NDGVL                                                            | FPAM <b>N</b> VNDH                    | --VT <b>G</b> NKHVIR          | GAIV <b>C</b> NSGH--                   | ---- <b>G</b> H----           |  |
|                                              | 1.1.1.28   | LDHD_ECOLI          | PEAVA <b>E</b> HAIGM                                                           | MMTLN <b>R</b> RIHRA                  | PLTPEN <b>I</b> YHLLN         | GVMIVN <b>T</b> SRGA                   | VLFTG <b>H</b> QAFLT          |  |
|                                              | 1.20.1.1   | PTXD_PSEST          | TVPT <b>A</b> E <b>L</b> LAIGL                                                 | AVGL <b>G</b> RHLRAA                  | PLNAD <b>T</b> QHLVN          | GALLV <b>N</b> PCRGS                   | TLFTP <b>H</b> IGSAV          |  |
|                                              | 1.2.1.2    | FDH_EMENI           | VVSVA <b>E</b> HVVMT                                                           | ILL <b>L</b> V <b>R</b> NFVPA         | PLHE <b>K</b> T <b>R</b> GLFN | GSWL <b>V</b> N <b>T</b> ARGA          | ---- <b>H</b> PWGGG           |  |
|                                              | 1.2.1.2    | FDH_PICAN           | SNSVA <b>E</b> HVVMT                                                           | MLVL <b>V</b> R <b>N</b> FVPA         | PLHAG <b>S</b> KGLVN          | GAWL <b>V</b> N <b>T</b> ARGA          | AM- <b>T</b> P <b>H</b> Y---- |  |
|                                              | 1.1.1.29   | DHG <b>I</b> _METEX | FNTV <b>P</b> E <b>H</b> VVGL                                                  | MFAL <b>R</b> RAIVPY                  | PLTPD <b>T</b> KNMIG          | SAIL <b>I</b> N <b>T</b> ARGG          | --V <b>T</b> P <b>H</b> VAWAS |  |
|                                              | 1.1.1.215  | TKRA_BACSU          | DDTV <b>A</b> D <b>L</b> AFSL                                                  | ILSS <b>A</b> RRVAEL                  | PLTDE <b>T</b> YHMIG          | SAIF <b>V</b> N <b>I</b> SRGK          | VTLL <b>P</b> <b>H</b> IGSAT  |  |
|                                              | non-enz.   | CTBP_XENLA          | VEETA <b>D</b> STMCH                                                           | ILNL <b>I</b> <b>R</b> RTT <b>W</b> L | GLNE <b>H</b> N <b>H</b> HLIN | GAF <b>L</b> V <b>N</b> T <b>A</b> RGG | LICT <b>P</b> <b>H</b> AAWYS  |  |
|                                              | .....      |                     |                                                                                |                                       |                               |                                        |                               |  |

**Figure S1.** Example of Functionally Discriminating Residues (FDRs). Aligned positions (numbered boxes outlined in red) corresponding to FDRs in the Homofunctional Multiple Sequence Alignment (MSA) and Heterofunctional MSA for an enzyme family whose seed EC number is 1.1.1.28 (D-lactate dehydrogenase). The six FDRs are selected for their ability to discriminate between Homofunctional (i.e., D-lactate dehydrogenases) and Heterofunctional family members (i.e., evolutionary related proteins with any other function). We assign EC number 1.1.1.28 to any sequence recognized as member of the family by a Hidden Markov Model and showing conservation of the six FDRs: E113, R124, N218, N238, R240 (which corresponds to an active site residue in D-lactate dehydrogenases, e.g. active site residue R234 in LDHD\_ECOLI) and H302.
